# Supplementary material for: Do polygenic risk and stressful life events predict pharmacological treatment response in obsessive compulsive disorder? A gene–environment interaction approach
Source: PubMed Central journal article supplement (PMC6362161; doi:10.1038/s41398-019-0410-0), 2019-02-04
Supplement: 41398_2019_410_MOESM2_ESM.pdf [file 41398_2019_410_MOESM2_ESM.pdf]

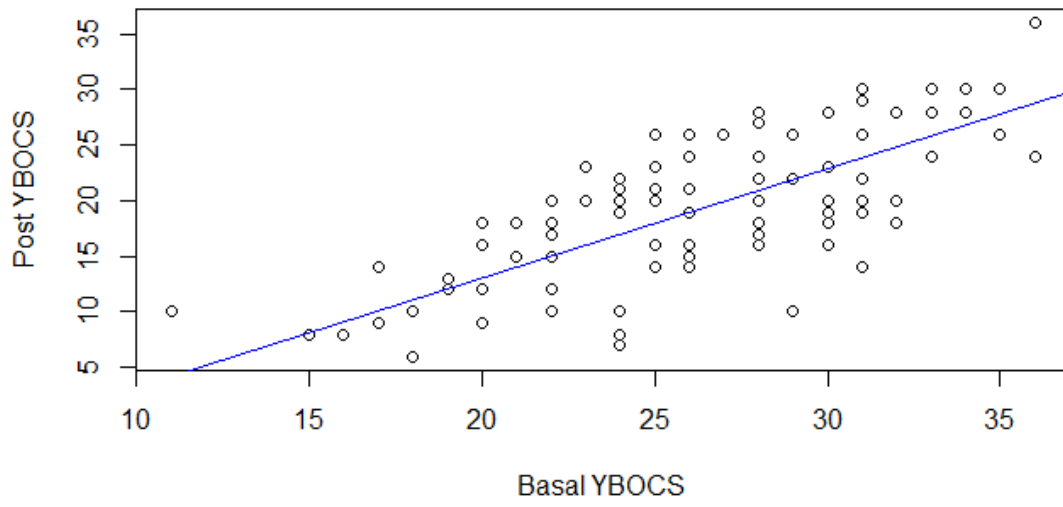

**Figure S1.** Scatterplot of Post YBOCS scores for different Basal Y-BOCS scores. Trend line (blue) indicates regression model fit.
